# Supplementary material for: Facile and template-free synthesis of robust, highly active and easily recyclable submicrometer-sized hierarchical TS-1 aggregates composed of ultra-small nanocrystallites (<50 nm)
Source: Royal Society of Chemistry journal article supplement (doi:10.1039/d3ce00127j), 2023-01-01
Supplement: d3ce00127j1.pdf [file d3ce00127j1.pdf]

## Supporting Information for

### **Facile and template-free synthesis of robust, highly active and easily recyclable submicrometer-sized hierarchical TS-1 aggregates composed of ultra-small nanocrystalline (< 50 nm)**

Linghao Li <sup>a, b</sup>, Wei Wang <sup>a</sup>, Jian Huang <sup>a, \*</sup>, Rongmin Dun <sup>a</sup>, Bowen Lu <sup>a, b</sup>, Yiwei Liu <sup>a</sup>, Jingxian Wu <sup>a, b</sup>, Siyu Yang <sup>a, b</sup>, Zile Hua <sup>a, b, \*</sup>

<sup>a</sup> State Key Lab of High Performance Ceramics and Superfine Microstructure, Shanghai Institute of Ceramics, Chinese Academy of Sciences, Shanghai 200050, China. E-mail: [huangjian2@mail.sic.ac.cn](mailto:huangjian2@mail.sic.ac.cn); [huazl@mail.sic.ac.cn](mailto:huazl@mail.sic.ac.cn)

<sup>b</sup> Centre of Materials Science and Optoelectronics Engineering, University of Chinese Academy of Sciences, Beijing 100049, China

## Experimental Section

### Materials

All chemicals were obtained from commercial suppliers and used without further purification: tetrapropylammonium hydroxide (TPAOH, Yixing Dahua Chemical, 25% in water), tetraethyl orthosilicate (TEOS, Shanghai Lingfeng Chemical Reagent, AR), tetrabutyl titanate (TBOT, Sinopharm Chemical Reagent, AR), isopropanol (Shanghai Lingfeng Chemical Reagent, AR), acetonitrile (Genereal-Reagent, AR), thiophene (Th, J&K Chemical, AR), benzothiophene (BT, J&K Chemical, AR), dibenzothiophene (DBT, J&K Chemical, AR), 4-methyldibenzothiophene (4-MDBT, J&K Chemical, AR), 4,6-dimethyldibenzothiophene (4,6-DMDBT, J&K Chemical, AR), hydrogen peroxide aqueous solution (H<sub>2</sub>O<sub>2</sub>, SCR, AR).

### Synthesis of submicrometer-sized hierarchical TS-1 aggregates

In a typical run for preparation of *aggTS-1*, 10.98 g of TPAOH solution was added dropwise into a mixture of 10.42 g TEOS and 18.0 g of deionized water and continuously stirred for 4 h at 40 °C (Solution I). Meanwhile, 0.43 g TBOT was dissolved in 6.0 g of isopropanol (*i*-PrOH) in an ice-water bath of 0 °C and kept stirring for 4 h (Solution II). Next, Solution I was cooled down to 4 °C in an ice-water bath firstly and then Solution II was added dropwise into it under stirring. The molar composition of sol precursor was SiO<sub>2</sub>: 0.025 TiO<sub>2</sub>: 0.27 TPAOH: 29.2 H<sub>2</sub>O: 2 *i*-PrOH. The resulting mixture was kept stirring at 4 °C for another 4 h and concentrated at 40 °C for 24 h. The obtained gel was then transferred in a freeze-drying machine and further dehydrated at -50 °C for 10 h to remove the residual moisture and get the fully dried gel precursors. To carry out the SAC treatment, 3.6 g of freeze-dried gel precursors were put into a smaller Teflon container which was then sealed in a 100 ml Teflon-lined stainless steel autoclave. 0.7 g of deionized water was added into the bottom of Teflon liner of the autoclave, avoiding the direct contact with the gel precursors. The SAC process was conducted at 180 °C for 10 h. After that, it was cooled to room temperature. The powder product was filtered, washed repeatedly with deionized water and dried at 80 °C overnight. Finally, it was calcined in a muffle furnace at 550 °C for 6 h. The resultant materials were denoted as *aggTS-1*(*x*), in which *x* refer to the TPAOH/SiO<sub>2</sub> molar ratio of the sol compositions, e.g. *aggTS-1*(0.27). Correspondingly, the control samples were named as TS-1(*x*), e.g. TS-1(0.27), which were synthesized according to the similar procedure but without the freeze-drying step before

SAC treatment.

### **Material characterization**

SEM images were obtained on a field-emission scanning electron microscopy of Hitachi SU8220. HRTEM images and selected area electron diffraction patterns were recorded on a JEM-2100F electron microscope. DLS measurements were recorded on a Malvern Panalytical-Zetasizer Nano-ZS90. XRD patterns were recorded on a Rigaku D/Max 2200PC powder X-ray diffractometer with Cu K $\alpha$  radiation (40 kV, 40 mA) in the 2 $\theta$  range from 5° to 50°. The relative crystallinity of synthesized materials was calculated from the peak area of five strong peaks in the 2 $\theta$  range of 22-25°. UV-Vis diffuse reflectance spectra were recorded in the range of 190 – 800 nm on a Shimadzu UV-310PC spectrometer with an integrating sphere accessory and BaSO<sub>4</sub> as the reference. Nitrogen sorption isotherms were obtained on a Micromeritics TriStar 3020 porosimeter at 77 K. All samples were degassed at 150 °C for 12 h under flowing nitrogen before the measurement. The specific surface areas were calculated by the Brunauer-Emmett-Teller (BET) method and pore size distribution were calculated by the Barrett-Joyner-Halenda (BJH) method basing on the adsorption branches of the isotherms. The micropore volumes and external surface areas were derived from the t-plot method calculation. Elemental content analysis was recorded on an inductively coupled plasma optical emission spectrometer (ICP-OES) of Agilent 725. XPS results were obtained on an ESCALab250.

### **Catalytic reaction**

The comprehensive oxidative desulfurization behavior was evaluated using thiophene (Th), benzothiophene (BT), dibenzothiophene (DBT), 4-methyldibenzothiophene (4-MDBT), 4,6-dimethyldibenzothiophene (4,6-DMDBT) as model sulfur compounds. Typically, 10 mL of model fuel oil (500 ppm sulphur content in *n*-octane), 10 mL of acetonitrile or water as solvent, 63.75  $\mu$ L of H<sub>2</sub>O<sub>2</sub> (30 wt%), 50 mg catalyst were stirred at 333 K for 6 h. During this period of time, the products were sampled per hour, diluted in 1 mL ethanol and analyzed on Shimadzu GC-2010 Plus equipped with an autosampler, two 30 m Rxi-5Sil MS capillary columns, a flame ionization detector and a mass detector. For the recycling-regeneration of catalysts, the spent catalysts in the DBT reaction media were filtered and washed several times with acetonitrile. After dried at 60 °C for 12 h, the catalysts were transferred to a muffle furnace and calcined at 550 °C for 6 h. The regenerated catalyst is used for the new DBT catalytic oxidation reaction, and the recycling-regeneration test

was conducted 5 times.

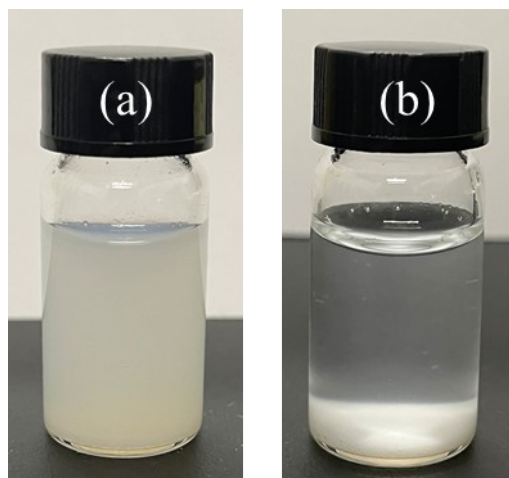

Figure S1. Digital photographs of synthesized (a) TS-1(0.27), (b) *agg*TS-1(0.27) dispersed in water.

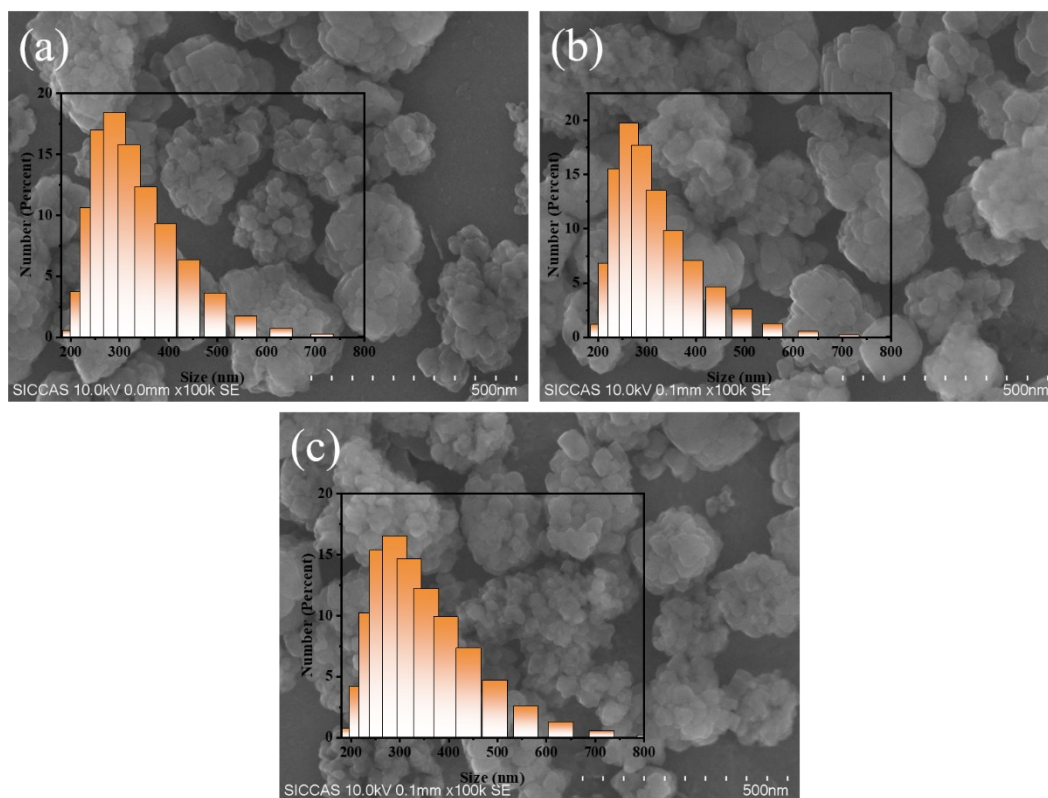

Fi

Figure S2. SEM images and DLS particle size distribution of sample *aggTS-1(0.27)* experienced (a) 1 h, (b) 3 h, and (c) 6 h ultrasonic treatment.

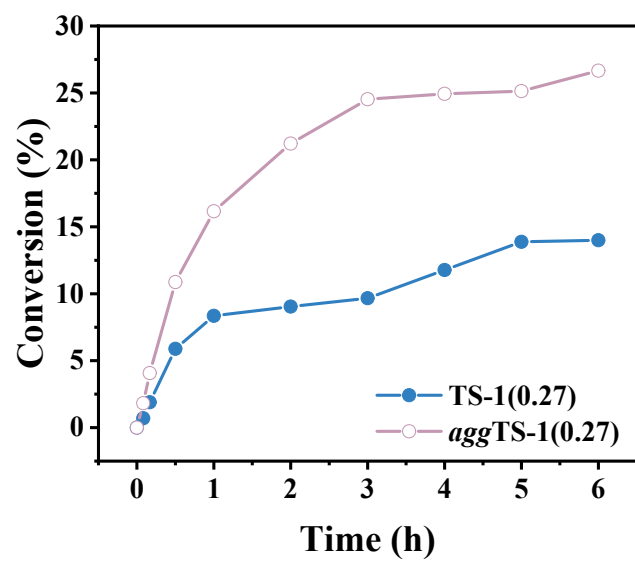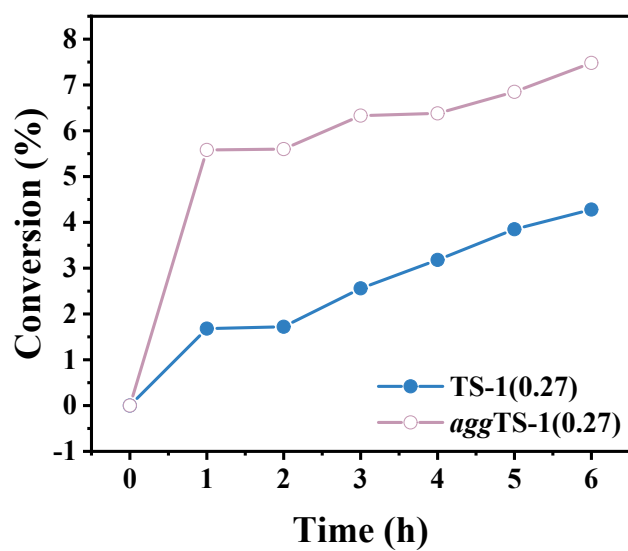

Figure S3. Conversion of 4-MDBT and 4,6-DMDBT as a function of reaction time over synthesized catalysts.

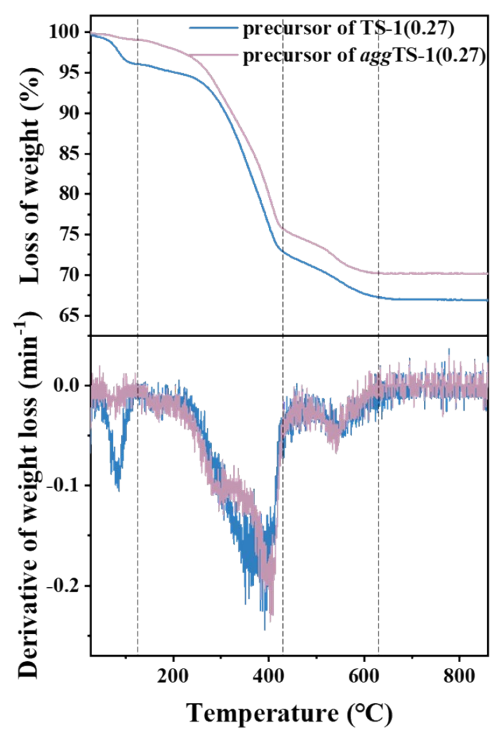

Figure S4. Thermogravimetric analysis curve of precursor of TS-1(0.27) and *agg*TS-1(0.27).

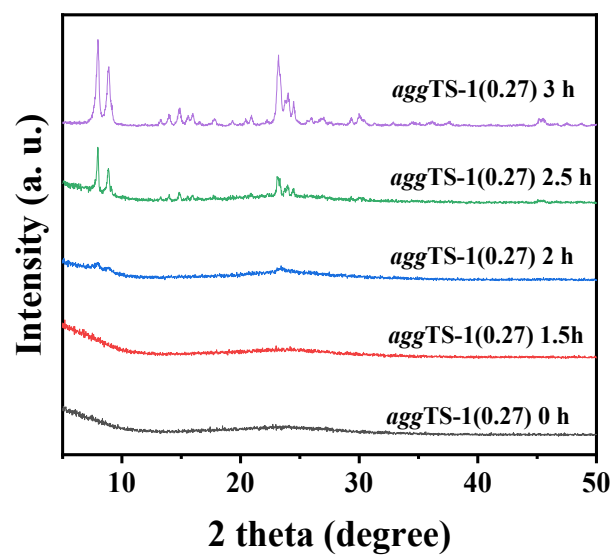

Figure S5 Powder XRD patterns of synthesized *aggTS-1(0.27)* with varied SAC treating times.



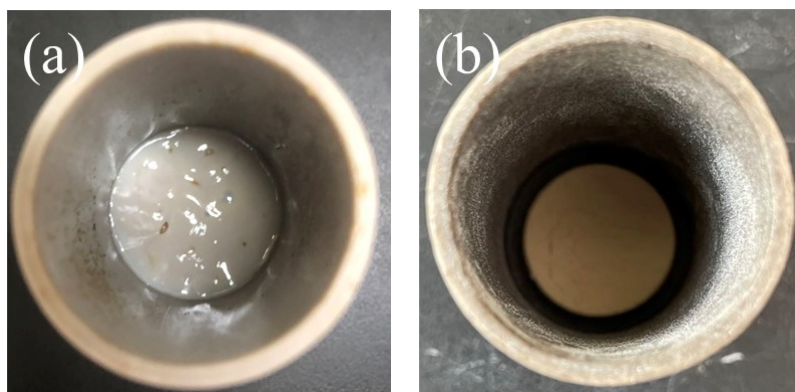

Figure S6 Digital photographs of synthesized (a) TS-1(0.27) and (b) *agg*TS-1(0.27) by SAC procedure.

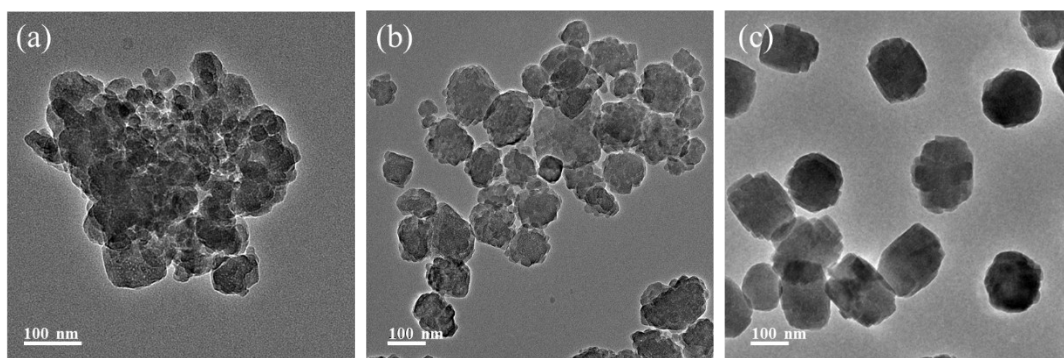

Figure S7 SEM images of synthesized catalysts with different water content (a) 0 wt%, (b) 3 wt%, (c) 5 wt%.

Table S1 Catalytic performance comparison between the *aggTS-1* and the literature-reported TS-1 zeolites

| Sample                      | S-substrate | Time (h) | Catal. amount (mg) | Solvent | Temp. (K) | H <sub>2</sub> O <sub>2</sub> /S | Conv. (%)         | Ref.      |
|-----------------------------|-------------|----------|--------------------|---------|-----------|----------------------------------|-------------------|-----------|
| <b>HTS-1(0.35)</b>          | BT          | 6        | 100                | MeOH    | 333       | -                                | 100               | 1         |
| <b>TS-1 H2</b>              | BT          | 6        | 100                | MeOH    | 333       | 4                                | 100               | 2         |
|                             | Th          | 6        | 100                | Water   | 333       | 4                                | 90                |           |
| <b>HTS-1</b>                | Th          | 4        | 100                | Water   | 333       | 4                                | 100               | 3         |
|                             | BT          | 4        | 100                | MeOH    | 333       | 4                                | 100               |           |
|                             | DBT         | 4        | 100                | MeOH    | 333       | 4                                | 100               |           |
| <b>TS-1 meso</b>            | BT          | 3        | 50                 | --      | 323       | 10                               | 87                | 4         |
| <b>TS-1 nanoplates</b>      | DBT         | 2        | 100                | None    | 333       | 2                                | 12                | 5         |
| <b><i>aggTS-1</i>(0.27)</b> | Th          | 2        | 50                 | Water   | 333       | 4                                | 100               | This work |
|                             | BT          | 6        | 50                 | ACN     | 333       | 4                                | 89.9 <sup>a</sup> |           |
|                             | DBT         | 6        | 50                 | ACN     | 333       | 4                                | 91.6 <sup>a</sup> |           |

<sup>a</sup> The extraction contribution of solvent is included, i.e. 66.0% and 60.0% extraction efficiency for BT and DBT, respectively.

## Reference

1. W. Wang, G. Li, L. Liu and Y. Chen, *Microporous and Mesoporous Materials*, 2013, **179**, 165-171.
2. X. Wang, G. Li, W. Wang, C. Jin and Y. Chen, *Microporous and Mesoporous Materials*, 2011, **142**, 494-502.
3. Q. Lv, G. Li and H. Sun, *Fuel*, 2014, **130**, 70-75.
4. A. Sengupta, P. D. Kamble, J. K. Basu and S. Sengupta, *Industrial & Engineering Chemistry Research*, 2012, **51**, 147-157.
5. G. Lv, S. Deng, Y. Zhai, Y. Zhu, H. Li, F. Wang and X. Zhang, *Applied Catalysis A-General*, 2018, **567**, 28-35.
